# Supplementary material for: Isoflavone Consumption and Risk of Breast Cancer: An Updated Systematic Review with Meta-Analysis of Observational Studies
Source: MDPI journal article supplement (doi:10.3390/nu15102402), 2023-05-21
Supplement: s1 [file s1]

|                         |   |
|-------------------------|---|
| Keiko Wada 2013         | + |
| Lesley M Butler 2010    | + |
| Michelle L. Baglia 2016 | + |
| Raul Zamora-Ros 2013    | + |
| Ritsuko Shirabe 2021    | + |
| Yukiko Morimoto 2014    | + |
| Yuxia Wei 2020          | + |

|   |   |   |   |   |   |   |
|---|---|---|---|---|---|---|
| + | + | + | + | + | + | + |
| + | + | + | + | + | + | + |
| + | - | - | - | + | - | + |
| + | + | + | + | + | + | + |
| + | + | + | ? | + | ? | + |
| + | + | + | + | + | + | + |
| + | + | + | + | + | + | + |
| + | + | + | + | + | + | + |

Representativeness of the exposed cohort

Selection of the non exposed cohort

Ascertainment of exposure

Demonstration that outcome of interest was not present at start of study

Comparability of cohorts on the basis of the design or analysis

Assessment of outcome

Was follow-up long enough for outcomes to occur

Adequacy of follow up of cohorts
