# Supplementary material for: Isoflavone Consumption and Risk of Breast Cancer: An Updated Systematic Review with Meta-Analysis of Observational Studies
Source: MDPI journal article supplement (doi:10.3390/nu15102402), 2023-05-21
Supplement: s1 [file s1]

| Author                       | Is the case definition adequate? | Representativeness of the cases | Selection of Controls | Definition of Controls | Comparability of cases and controls on the basis of the design or analysis | Ascertainment of exposure | Same method of ascertainment for cases and controls | Non-Response rate |
|------------------------------|----------------------------------|---------------------------------|-----------------------|------------------------|----------------------------------------------------------------------------|---------------------------|-----------------------------------------------------|-------------------|
| Anna H Wu 2002               | +                                | +                               | +                     | +                      | +                                                                          | +                         | +                                                   | -                 |
| Caixia Zhang 2009            | +                                | +                               | -                     | +                      | +                                                                          | +                         | +                                                   | +                 |
| Isabel dos Santos Silva 2004 | -                                | +                               | +                     | -                      | +                                                                          | +                         | +                                                   | +                 |
| Jakob Linseisen 2004         | -                                | +                               | +                     | -                      | +                                                                          | +                         | +                                                   | -                 |
| K Hirose 2005                | +                                | +                               | -                     | +                      | +                                                                          | +                         | +                                                   | -                 |
| Laura N. Anderson 2012       | -                                | +                               | +                     | -                      | +                                                                          | +                         | +                                                   | +                 |
| Lin Li 2013                  | +                                | +                               | +                     | +                      | +                                                                          | +                         | +                                                   | +                 |
| Masakazu Toi 2013            | +                                | +                               | +                     | -                      | +                                                                          | +                         | +                                                   | -                 |
| Michelle Cotterchio 2007     | +                                | +                               | +                     | +                      | +                                                                          | +                         | +                                                   | -                 |
| Min Zhang 2009               | +                                | +                               | -                     | +                      | +                                                                          | -                         | +                                                   | +                 |
| Motoki Iwasaki 2008          | +                                | +                               | -                     | +                      | +                                                                          | +                         | +                                                   | +                 |
| Pamela L. Horn-Ross 2001     | -                                | +                               | -                     | -                      | +                                                                          | +                         | +                                                   | +                 |
| Qiong Wang 2011              | +                                | +                               | +                     | +                      | +                                                                          | +                         | +                                                   | -                 |
| Xiao-Li Feng 2019            | +                                | +                               | -                     | +                      | +                                                                          | +                         | +                                                   | +                 |
| YA Cho 2010                  | +                                | +                               | -                     | +                      | +                                                                          | +                         | +                                                   | -                 |
| Yan-yun Zhu 2011             | +                                | +                               | -                     | +                      | +                                                                          | +                         | +                                                   | +                 |
| Yao-Jen Chang 2017           | -                                | +                               | -                     | +                      | +                                                                          | +                         | +                                                   | -                 |
