# Supplementary material for: Isoflavone Consumption and Risk of Breast Cancer: An Updated Systematic Review with Meta-Analysis of Observational Studies
Source: MDPI journal article supplement (doi:10.3390/nu15102402), 2023-05-21
Supplement: s1 [file s1]

Table S1.

**Description of population, intervention/exposure, comparison, and outcome (PICO).**

|                              |                                                                                                                                             |
|------------------------------|---------------------------------------------------------------------------------------------------------------------------------------------|
| <b>Population</b>            | Inclusion: Female adults. Exclusion: Female children or adolescents (under 18 years of age) and male.                                       |
| <b>Intervention/Exposure</b> | Dietary isoflavone are defined as those taken from food/diet, excluding the isoflavone supplements in the form of capsules or tablets, etc. |
| <b>Comparison</b>            | The dietary isoflavone consumption (the lowest vs. the highest)                                                                             |
| <b>Outcome</b>               | Breast cancer.                                                                                                                              |
