# Supplementary material for: Isoflavone Consumption and Risk of Breast Cancer: An Updated Systematic Review with Meta-Analysis of Observational Studies
Source: Nutrients. 2023 May 21;15(10):2402. doi: 10.3390/nu15102402 (PMC10224089; doi:10.3390/nu15102402)
Supplement: Supplementary file 1 [file nutrients-15-02402-s001.zip]

Archive with 17 entries (17 files):
- Figure S1 A.pdf
- Figure S1 B.pdf
- Figure S2 A.pdf
- Figure S2 B.pdf
- Figure S3 A.pdf
- Figure S3 B.pdf
- Figure S3 C.pdf
- Figure S3 D.pdf
- Figure S3 E.pdf
- Figure S3 F.pdf
- Figure S3 G.pdf
- Figure S4 A.pdf
- Figure S4 B.pdf
- Figure S4 C.pdf
- Figure S5.pdf
- Table S1.pdf
- Table S2.pdf
