# Supplementary figures and images for: Isoflavone Consumption and Risk of Breast Cancer: An Updated Systematic Review with Meta-Analysis of Observational Studies
Source: MDPI journal article supplement (doi:10.3390/nu15102402), 2023-05-21

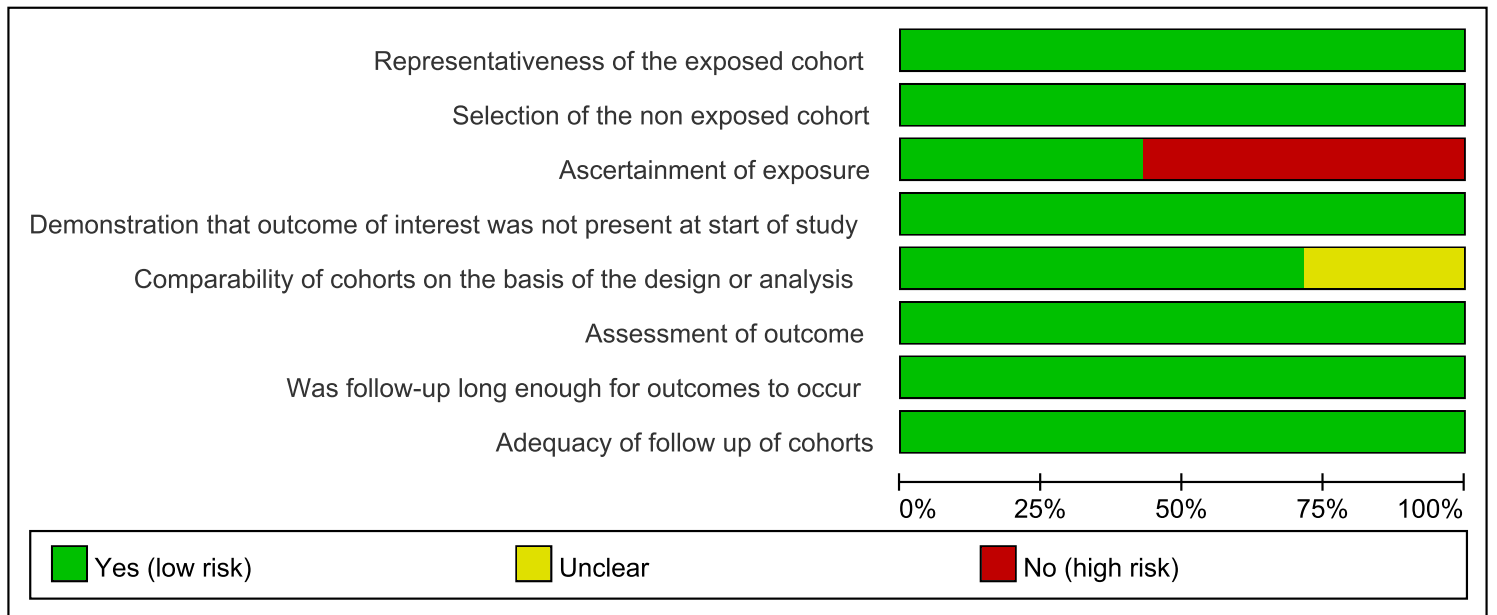

Supplement: s1 [file s1]

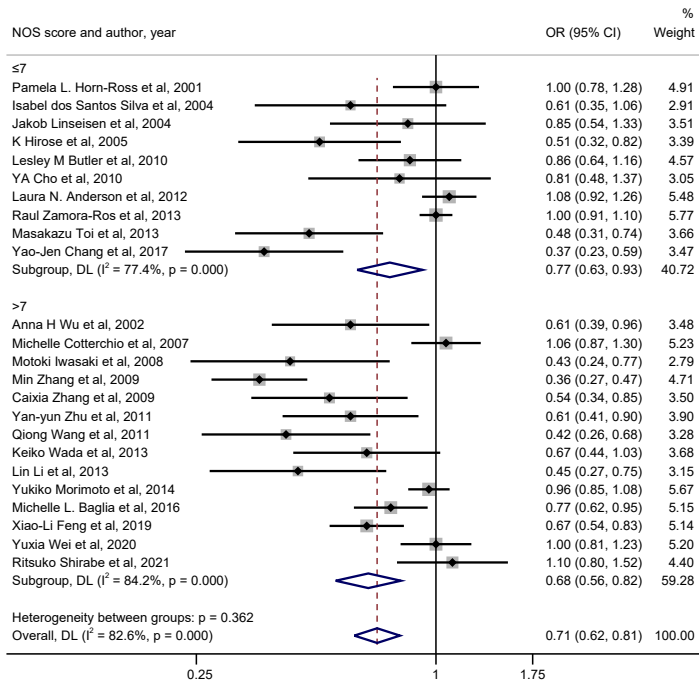

NOTE: Weights and between-subgroup heterogeneity test are from random-effects model

Supplement: s1 [file s1]

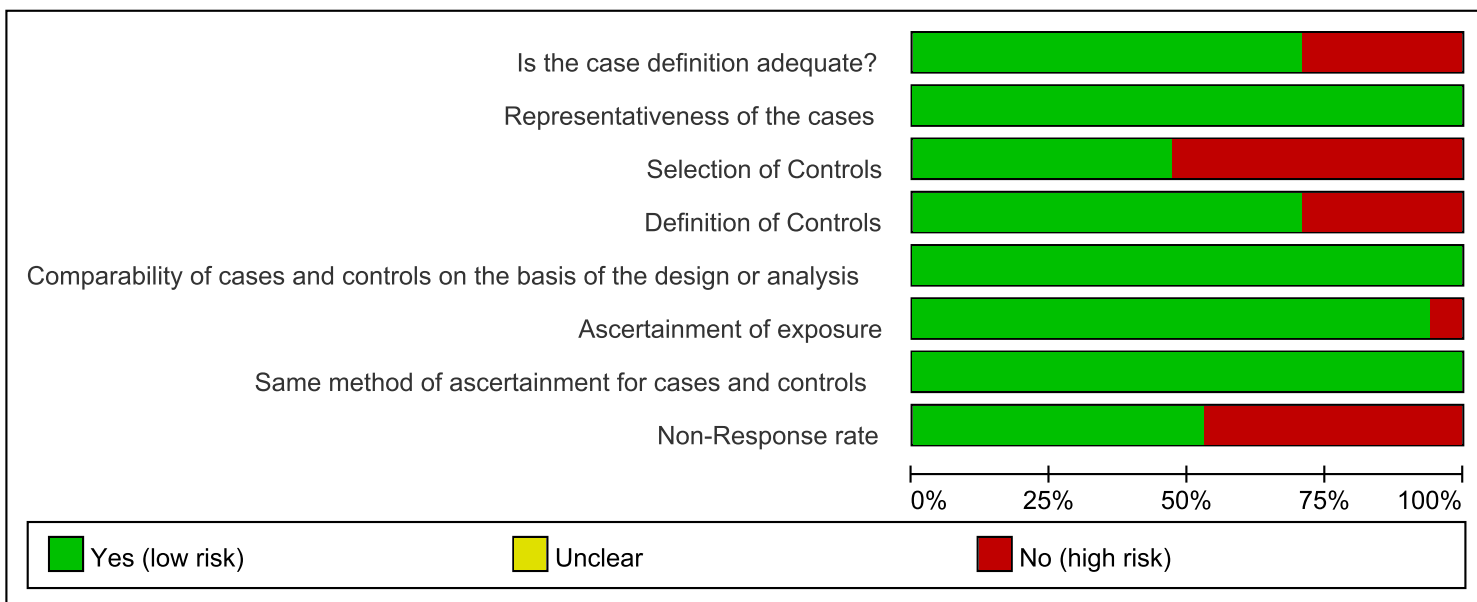

Supplement: s1 [file s1]

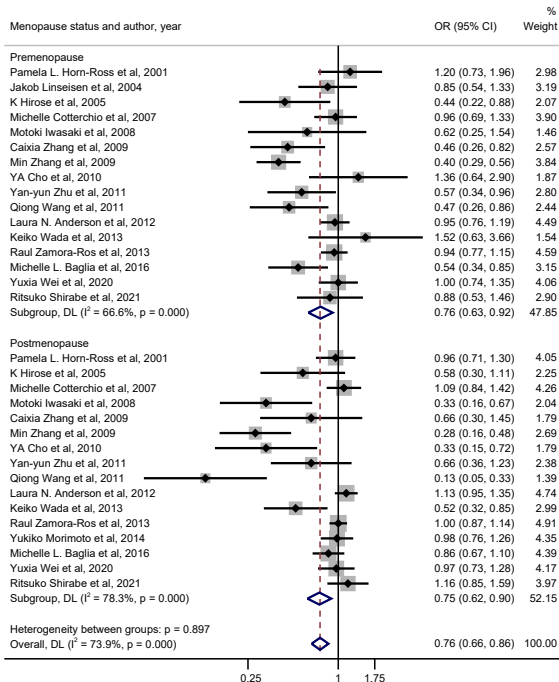

NOTE: Weights and between-subgroup heterogeneity test are from random-effects model

Supplement: s1 [file s1]

Funnel plot with pseudo 95% confidence limits

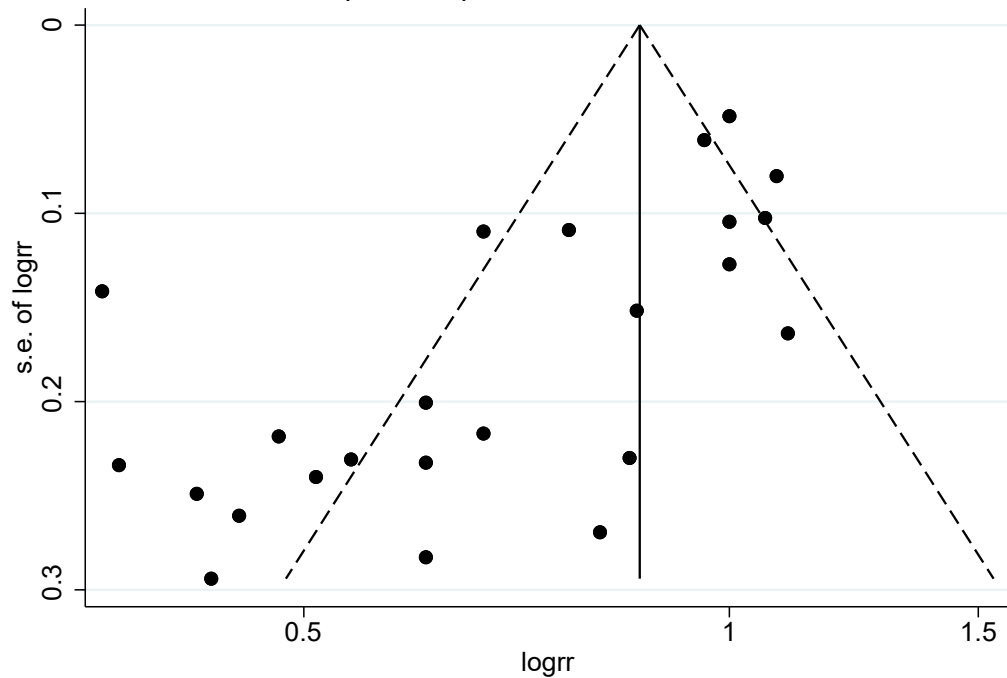

Supplement: s1 [file s1]

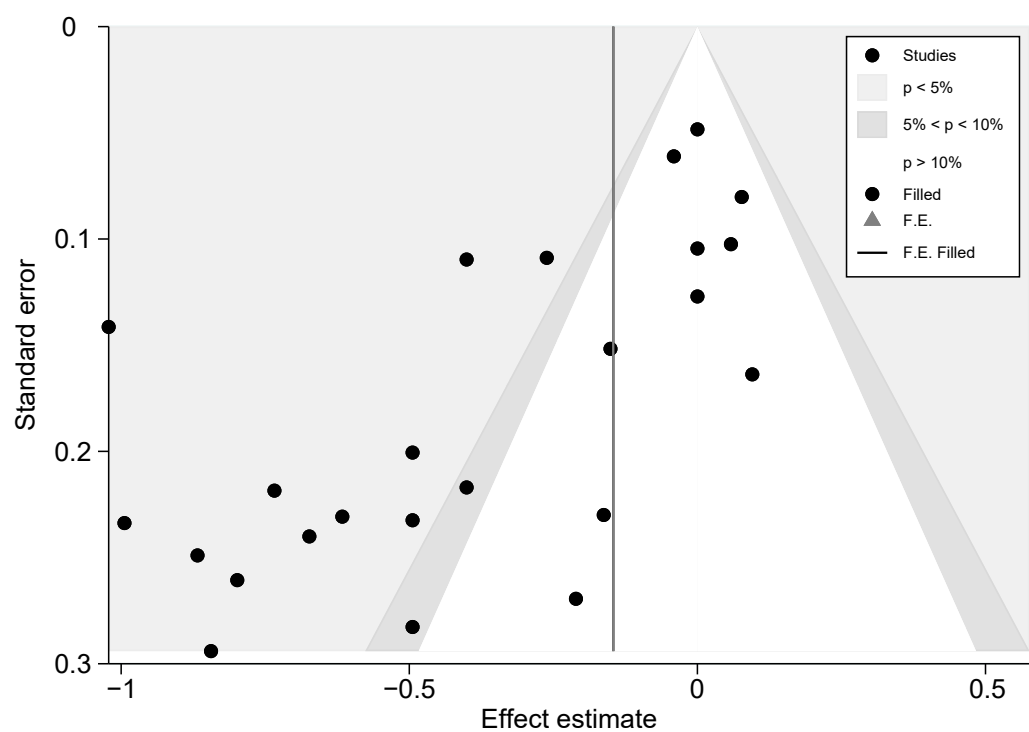

Supplement: s1 [file s1]

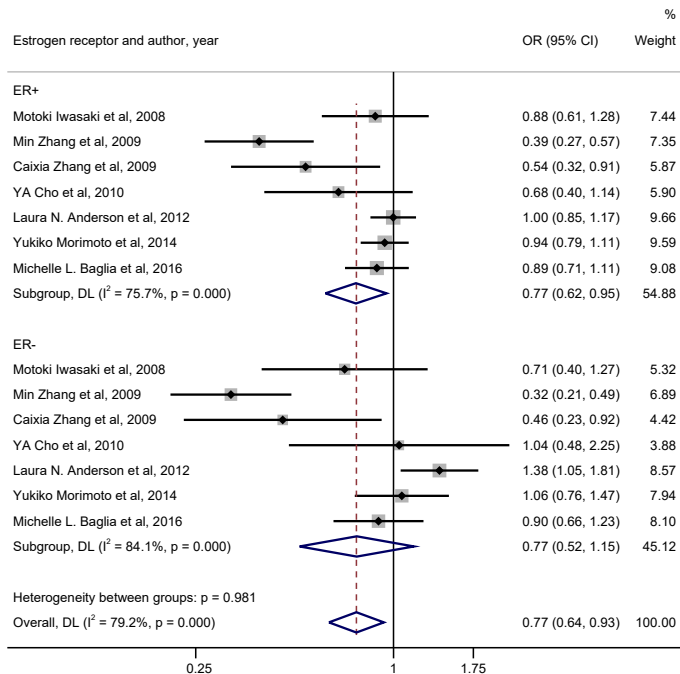

NOTE: Weights and between-subgroup heterogeneity test are from random-effects model

Supplement: s1 [file s1]

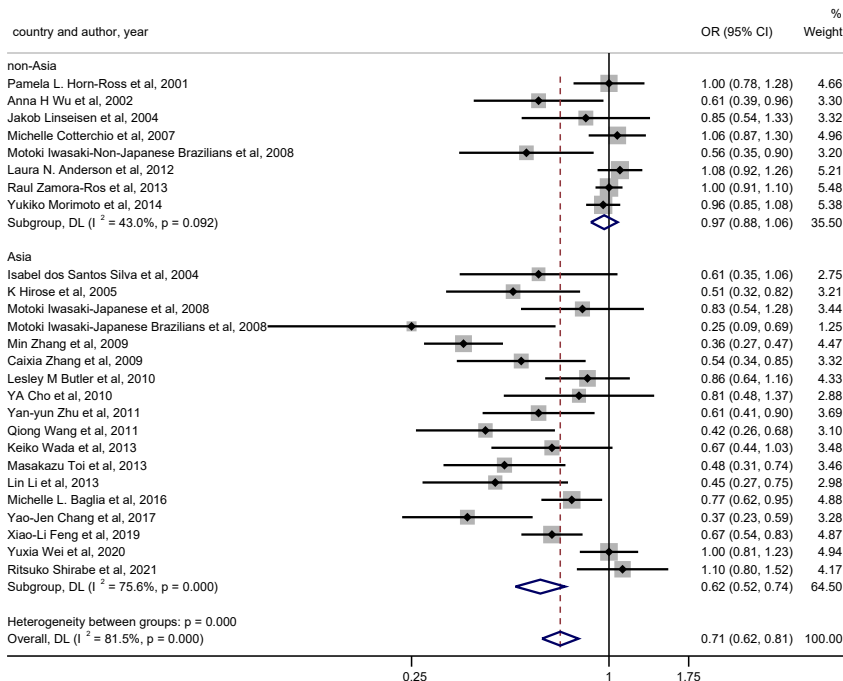

NOTE: Weights and between-subgroup heterogeneity test are from random-effects model

Supplement: s1 [file s1]

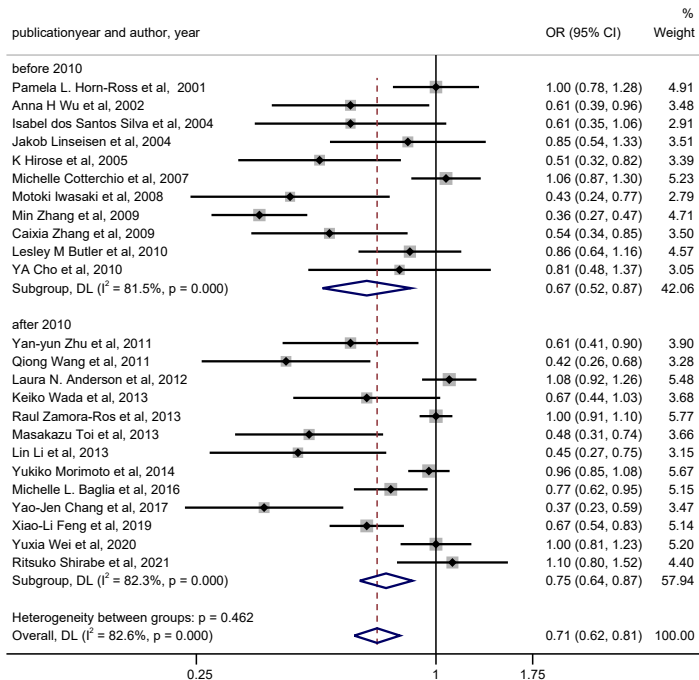

NOTE: Weights and between-subgroup heterogeneity test are from random-effects model

Supplement: s1 [file s1]

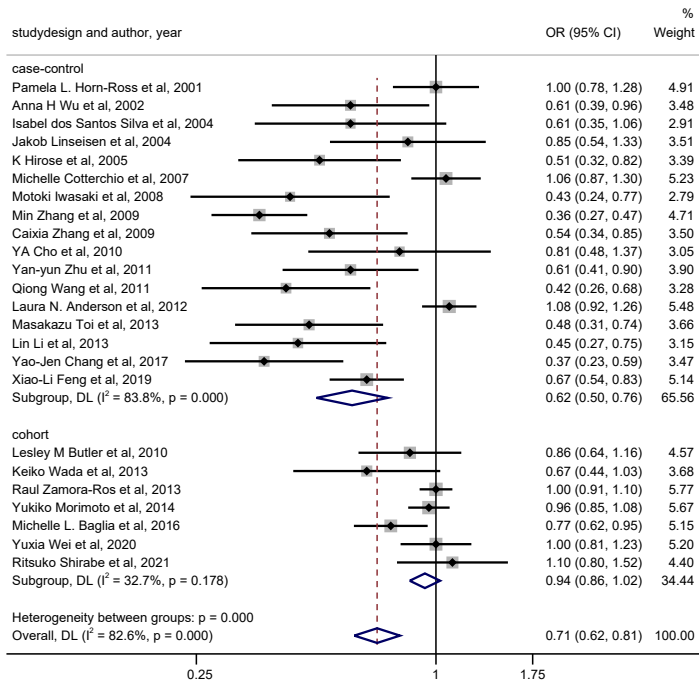

NOTE: Weights and between-subgroup heterogeneity test are from random-effects model

Supplement: s1 [file s1]

Egger's publication bias plot

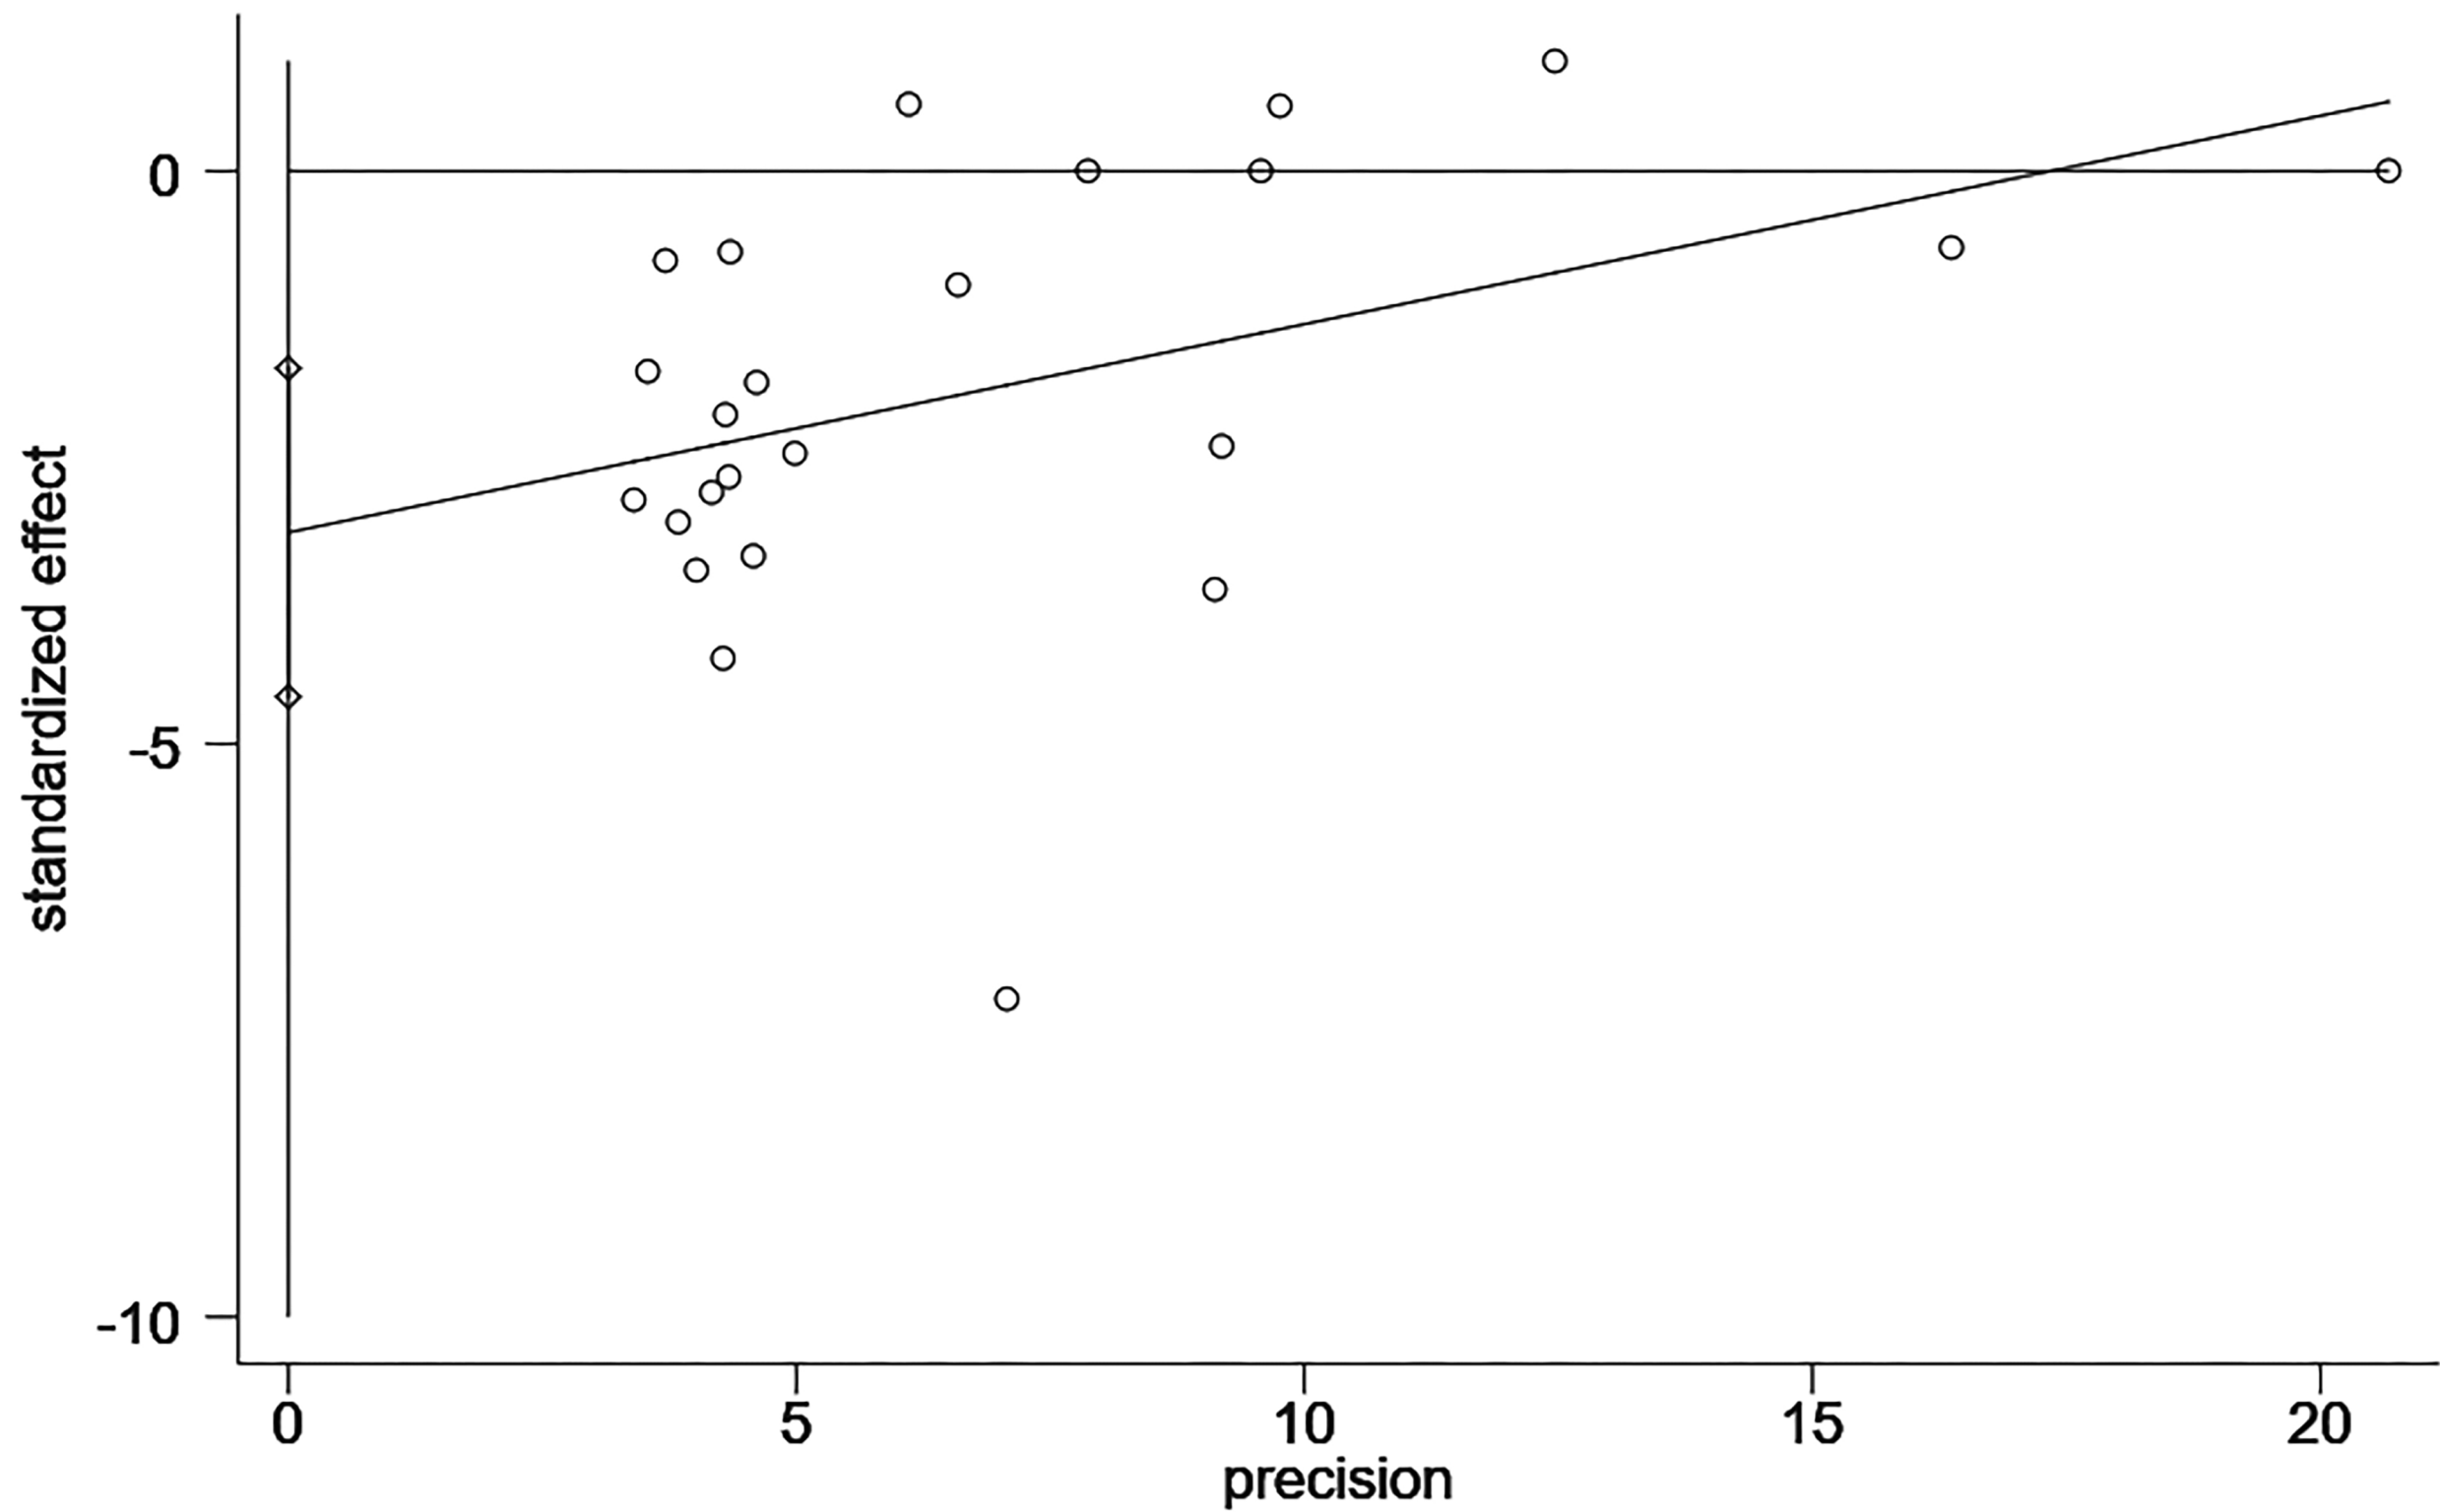

Supplement: s1 [file s1]

# Meta-analysis estimates, given named study is omitted

| Lower CI Limit    ○ Estimate    | Upper CI Limit

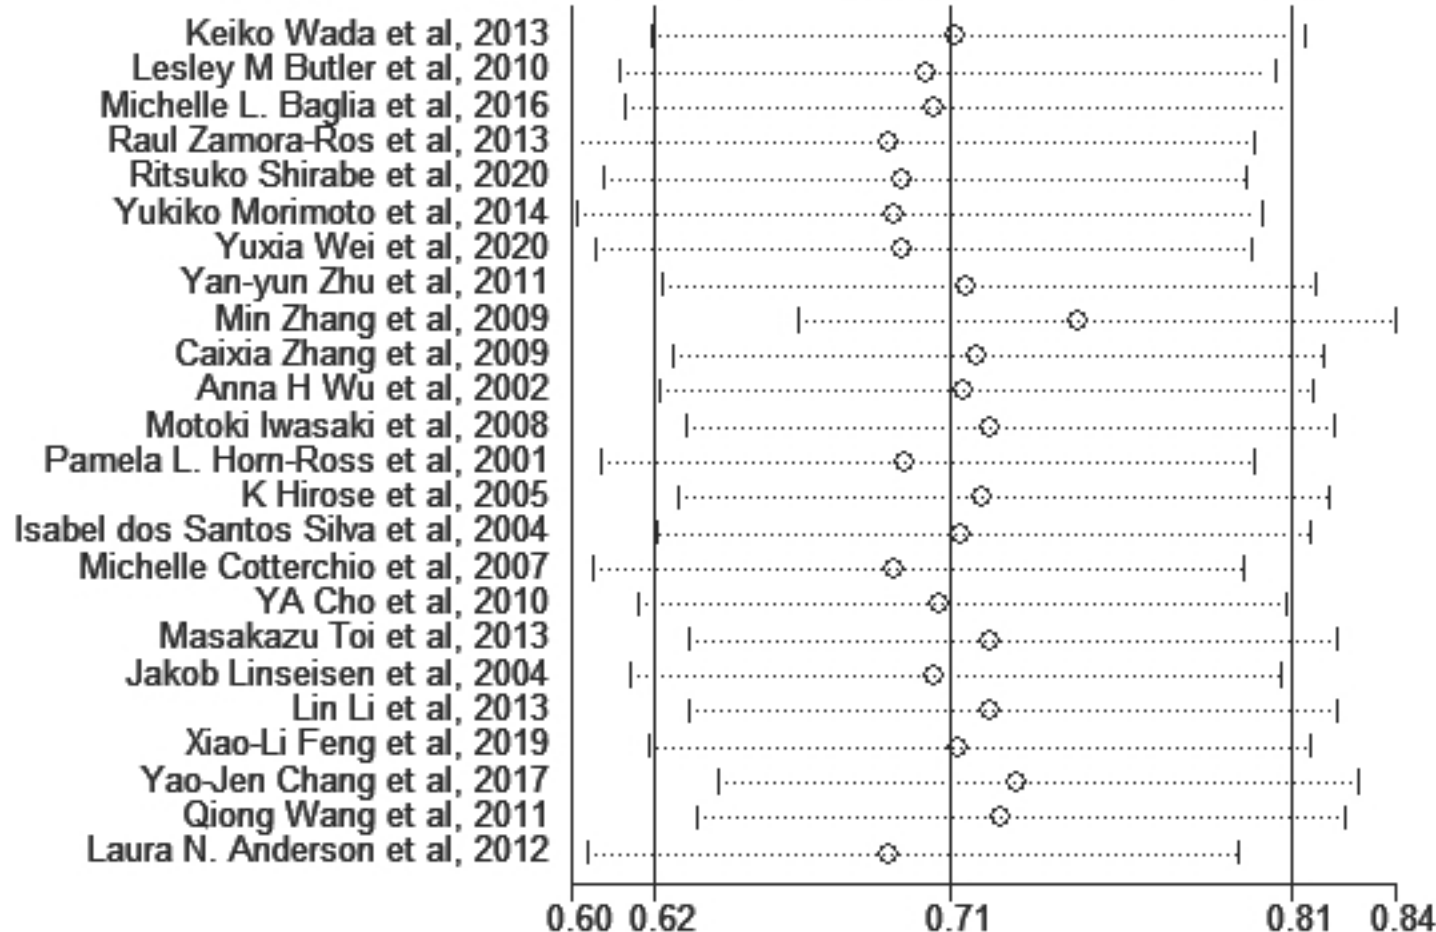

Supplement: s1 [file s1]

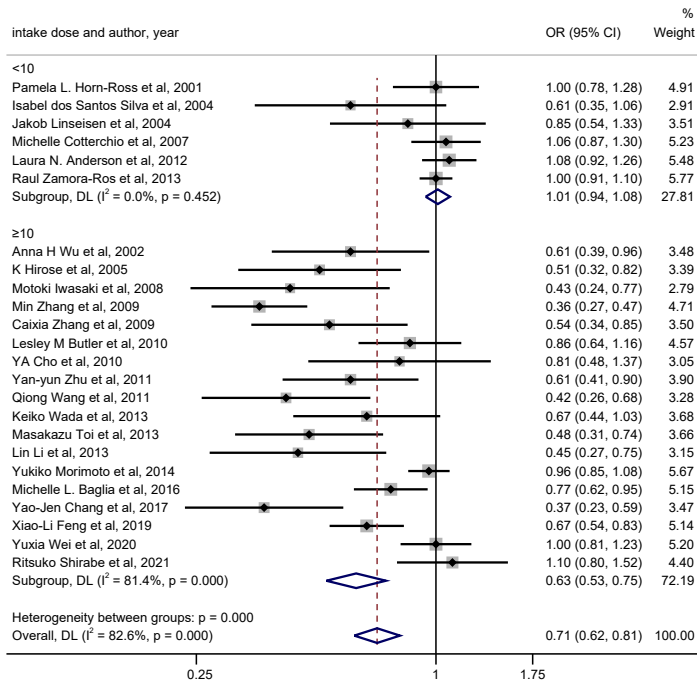

NOTE: Weights and between-subgroup heterogeneity test are from random-effects model

Supplement: s1 [file s1]
